# Supplementary material for: What Do We See in Spectra?: Assignment of High-Intensity Peaks of Cutibacterium and Staphylococcus Spectra of MALDI-TOF Mass Spectrometry by Interspecies Comparative Proteogenomics
Source: MDPI journal article supplement (doi:10.3390/microorganisms9061243), 2021-06-08

Supplemental material

**What do we see in spectra?: Assignment of high-intensity peaks of *Cutibacterium* and *Staphylococcus* spectra of MALDI-TOF mass spectrometry by inter-species comparative proteogenomics**

Itaru Dekio,<sup>1</sup> Yuki Sugiura,<sup>1</sup> Susumu Hamada-Tsutsumi,<sup>2</sup> Yoshiyuki Murakami,<sup>3</sup> Hiroto Tamura,<sup>2</sup> Makoto Suematsu<sup>1</sup>

1. Department of Biochemistry & Integrative Medical Biology, School of Medicine, Keio University, 35 Shinanomachi, Shinjuku-ku, Tokyo 160-8582, Japan

2. Department of Environmental Bioscience, Meijo University, 1-501 Shiogamaguchi, Tenpaku-ku, Nagoya, Aichi 468-8502, Japan

3. Seikakai Mildix Skin Clinic, 3<sup>rd</sup> Floor, 3-98 Senju, Adachi-ku, Tokyo 120-0034, Japan

\*Correspondence: Itaru Dekio, M.D., Ph.D.

[Present address]

Department of Dermatology, School of Medicine, The Jikei University

3-25-8 Nishi-shinbashi, Minato-ku, Tokyo 105-8461, Japan

Tel: +81-3-3433-1111 ext 3341, Fax: +81-3-5401-0125.

E-mail: [i@skinmicrobe.com](mailto:i@skinmicrobe.com)

**Table S1.** List of non-ribosomal proteins detected in in-gel analysis of five strains of genus *Cutibacterium*. Proteins with molecular weight of 15 kD or below are shown. acn IA<sub>1</sub>: *C. acnes* subsp. *acnes* type IA<sub>1</sub>, acn IB: *C. acnes* subsp. *acnes* type IB, acn II: *C. acnes* subsp. *defendens* type II, acn III: *C. acnes* subsp. *elongatum* type III, mod: *C. modestum*. + indicates detection.

| Protein name                                                              | MW (kD) | acn IA <sub>1</sub> | acn IB | acn II | acn III | mod |
|---------------------------------------------------------------------------|---------|---------------------|--------|--------|---------|-----|
| Uncharacterized protein                                                   | 5       |                     |        |        | +       |     |
| CsbD-like protein                                                         | 7       | +                   | +      | +      | +       | +   |
| Phosphotransferase EIIB                                                   | 7       |                     | +      |        | +       |     |
| Methylmalonyl-CoA carboxytransferase subunit 12S                          | 8       | +                   | +      | +      |         | +   |
| DUF3107/ATP-binding protein                                               | 8       |                     |        |        | +       |     |
| Acyl carrier protein                                                      | 8-9     | +                   | +      | +      | +       | +   |
| DNA-binding protein HU                                                    | 9       | +                   |        | +      | +       |     |
| Uncharacterized protein                                                   | 9       | +                   |        |        |         |     |
| PspC domain-containing protein                                            | 9-10    | +                   | +      |        | +       | +   |
| 10 kD chaperonin                                                          | 10      | +                   | +      | +      | +       | +   |
| Uncharacterized protein                                                   | 10      |                     |        |        | +       |     |
| DUF4235 domain-containing protein                                         | 10      |                     | +      |        |         |     |
| Biotin carboxyl carrier protein of methylmalonyl-CoA:pyruvate carboxylase | 11      | +                   | +      | +      | +       |     |
| Lsr2 family protein                                                       | 11      | +                   | +      | +      | +       |     |
| 11 kD antitoxin                                                           | 11      |                     | +      | +      |         |     |
| Methylmalonyl-CoA carboxytransferase                                      | 11      |                     |        |        |         | +   |
| Glycine cleavage system H protein                                         | 12      | +                   | +      | +      | +       |     |
| Fe-S accesspry protein                                                    | 12      |                     |        |        | +       |     |
| Uncharacterized protein                                                   | 13      | +                   |        |        |         |     |
| Thioredoxin                                                               | 13      |                     | +      | +      | +       | +   |
| DoxX family protein                                                       | 13      |                     | +      |        |         | +   |
| Translation initiation inhibitor/YjgF                                     | 14-15   |                     | +      |        |         |     |
| Response regulator transcription factor                                   | 15      |                     |        | +      |         |     |
| PTS EIIA type 2 (sugar transporter)                                       | 15      |                     |        |        | +       |     |
| UPF0336                                                                   | 15      |                     | +      |        | +       |     |

**Table S2.** Amino acid sequences of the assigned proteins of *Cutibacterium acnes* subsp. *acnes* JCM 6425<sup>T</sup>. Protein name

| Gene name                         | Amino acid sequence                                                                                                                                           | Molecular weight | Assigned m/z                                                              |
|-----------------------------------|---------------------------------------------------------------------------------------------------------------------------------------------------------------|------------------|---------------------------------------------------------------------------|
| 50S ribosomal protein L7/L12      | <i>rpL</i><br>MAKLSNEELLDAFKEMTLIELSEFVKQFEETFDVSAAAPVA<br>VAAAGAPAAAGGEAAPAEEEKDEFDVIRESAGDKKIQVIKEV<br>RGLTSLGLKDAKDLVESAPKPVLEKAKKEDAEKAKEALEA<br>AGATVTLK | 13701.59         | -Met [M+H] <sup>+</sup> : 13571.41<br>-Met [M+2H] <sup>2+</sup> : 6786.21 |
| Lsr2-like protein                 | ---<br>MAQRVRVDLVDDVDGSPAEE SVN FALDGVNYVIDLSAEN<br>ASKLRDALSLWVDHARRTGRRTRGRRPTGGPTANEVR<br>QWAKSQGYEVSERGRVSNEIREAYQRTH                                     | 11781.95         | -Met [M+H] <sup>+</sup> : 11651.76<br>-Met [M+2H] <sup>2+</sup> : 5826.39 |
| 10 kDa chaperonin GroS            | <i>groS</i><br>VATTIKPLEDRVLVQPLEAEQTTASGLVIPDTAKEKPQEGK<br>VISAGPGRVDDKGTRVPMDEVKEGDVVIFSKYGGTEVKYD<br>GQEYLLL NARDILAVVEK                                   | 10596.09         | -Val [M+H] <sup>+</sup> : 10497.97<br>-Val [M+2H] <sup>2+</sup> : 5249.49 |
| DNA-binding protein HU            | <i>hup</i><br>MTKSELIKT VAKQASLTEAQTNEAVKALTDVITAALAKGEK<br>VQLPGLFTAETVERPARNGRNPRTGESMTIPAHKAVKISA<br>SSTLKKAVAD                                            | 9588.06          | [M+H] <sup>+</sup> : 9589.07<br>[M+2H] <sup>2+</sup> : 4795.04            |
| CsbD-like protein                 | ---<br>VGLSDKINSKSDEAVGAAKEKIGGLTDDSDLKSAGADQKA<br>SGKVAQKVEDVKDKANDLKHNVQAAADKLKG                                                                            | 7278.07          | -Val [M+H] <sup>+</sup> : 7179.95<br>-Val [M+2H] <sup>2+</sup> : 3590.48  |
| 7 kD antitoxin                    | ---<br>MGLFDKAKDAISDRQDDIKNQASQHSQVEQGIDKAGNT<br>VDDKTGGKFSDQIDKGQDALKDKLGD                                                                                   | 7164.76          | -Met [M+H] <sup>+</sup> : 7034.57<br>-Met [M+2H] <sup>2+</sup> : 3517.79  |
| DUF3117 domain-containing protein | ---<br>MAAMKPRTGDGPMEVTKEGRGIIMRVPVEGGGRLVVELN<br>ADEAQELLACFKDVVG                                                                                            | 5842.82          | -Met [M+H] <sup>+</sup> : 5712.64                                         |

**Table S3.** Comparison chart of observed prominent MALDI peaks and calculated masses of significant proteins in *Cutibacterium* spectra. acn IA<sub>1</sub>: *C. acnes* subsp. *acnes* type IA<sub>1</sub>, acn IB: *C. acnes* subsp. *acnes* type IB, acn II: *C. acnes* subsp. *defendens* type II, acn III: *C. acnes* subsp. *elongatum* type III, mod: *C. modestum*, nam: *C. namnetense*, avi: *C. avidum*, gra: *C. granulosum*. Obs.: Observed m/z. Calc.: Calculated m/z. ND: Not detected. NP: Not present. Underlines or double underlines indicate the same calculated m/z values across species and subspecies.

| <u>Protein name</u>                               |       | <u>Species/subspecies</u> |                 |                 |                 |                 |                 |                 |                 |
|---------------------------------------------------|-------|---------------------------|-----------------|-----------------|-----------------|-----------------|-----------------|-----------------|-----------------|
|                                                   |       | acn IA <sub>1</sub>       | acn IB          | acn II          | acn III         | mod             | nam             | avi             | gra             |
| Putative sheep haemoglobin                        | Calc. | 15033.17                  | 15033.17        | 15033.17        | 15033.17        | 15033.17        | 15033.17        | 15033.17        | 15033.17        |
| alpha chain -Met [M+H] <sup>+</sup>               | Obs.  | <u>15041.93</u>           | <u>15047.06</u> | <u>15045.41</u> | <u>15045.67</u> | ND              | <u>15041.64</u> | <u>15052.29</u> | <u>15046.48</u> |
| 50S ribosomal prot L7/L12 -Met [M+H] <sup>+</sup> | Calc. | <u>13571.41</u>           | NP              | <u>13571.41</u> | 13626.48        | 13586.42        | 13529.37        | 13572.39        | 13602.42        |
|                                                   | Obs.  | <u>13565.43</u>           | ND              | ND              | ND              | <u>13583.00</u> | ND              | <u>13575.42</u> | <u>13601.29</u> |
| Lsr2-like prot -Met [M+H] <sup>+</sup>            | Calc. | <u>11651.76</u>           | <u>11651.76</u> | <u>11651.76</u> | <u>11651.76</u> | 11712.76        | 11724.81        | 11629.67        | 11582.72        |
|                                                   | Obs.  | <u>11646.05</u>           | <u>11649.39</u> | <u>11651.38</u> | <u>11648.23</u> | <u>11708.91</u> | ND              | <u>11623.58</u> | <u>11581.71</u> |
| 10 kD Chaperonin GroS -Val [M+H] <sup>+</sup>     | Calc. | <u>10497.97</u>           | <u>10497.97</u> | <u>10497.97</u> | <u>10497.97</u> | 10510.02        | <u>10497.97</u> | 10525.98        | <u>10497.97</u> |
|                                                   | Obs.  | <u>10493.82</u>           | <u>10496.39</u> | <u>10495.79</u> | <u>10496.60</u> | <u>10507.86</u> | ND              | ND              | <u>10495.91</u> |
| DNA-binding prot HU [M+H] <sup>+</sup>            | Calc. | <u>9589.07</u>            | <u>9589.07</u>  | <u>9589.07</u>  | <u>9589.07</u>  | 9529.96         | 9529.02         | 9514.99         | 9601.09         |
|                                                   | Obs.  | <u>9586.01</u>            | <u>9587.65</u>  | <u>9587.41</u>  | <u>9589.36</u>  | <u>9528.55</u>  | <u>9527.97</u>  | <u>9518.68</u>  | <u>9600.35</u>  |
| Putative sheep haemoglobin                        | Calc. | 7517.09                   | 7517.09         | 7517.09         | 7517.09         | 7517.09         | 7517.09         | 7517.09         | 7517.09         |
| alpha chain -Met [M+2H] <sup>2+</sup>             | Obs.  | <u>7523.20</u>            | ND              | <u>7523.96</u>  | ND              | <u>7524.36</u>  | <u>7524.85</u>  | <u>7527.10</u>  | <u>7524.27</u>  |
| CsbD-like prot -Val/-Met [M+H] <sup>+</sup>       | Calc. | <u>7179.95</u>            | <u>7179.95</u>  | 7251.03         | 7237.98         | 7424.24         | 7283.97         | 7369.07         | NP              |
|                                                   | Obs.  | <u>7179.01</u>            | <u>7179.61</u>  | <u>7250.54</u>  | <u>7238.00</u>  | <u>7424.35</u>  | <u>7285.33</u>  | <u>7372.75</u>  | ND              |
| 7 kD Antitoxin -Met [M+H] <sup>+</sup>            | Calc. | 7034.57                   | 7004.55         | 6985.50         | 6971.52         | 6986.53         | 6940.46         | 7043.62         | 7017.54         |

|                                                     |       |                |                |                |                |         |                |         |                |
|-----------------------------------------------------|-------|----------------|----------------|----------------|----------------|---------|----------------|---------|----------------|
|                                                     | Obs.  | 7033.48        | 7002.77        | 6985.48        | 6969.34        | 6986.52 | 6939.36        | 7047.01 | 7017.81        |
| 50S ribosomal prot L7/L12 -Met [M+2H] <sup>2+</sup> | Calc. | <u>6786.21</u> | NP             | <u>6786.21</u> | 6813.75        | 6793.72 | 6765.19        | 6786.70 | 6801.72        |
|                                                     | Obs.  | 6785.03        | ND             | 6786.62        | ND             | 6793.46 | ND             | ND      | 6801.65        |
| Lsr2-like prot -Met [M+2H] <sup>2+</sup>            | Calc. | <u>5826.39</u> | <u>5826.39</u> | <u>5826.39</u> | <u>5826.39</u> | 5856.89 | 5862.91        | 5815.34 | 5791.87        |
|                                                     | Obs.  | 5825.25        | 5826.89        | 5825.46        | 5824.34        | 5856.20 | ND             | 5813.98 | 5791.43        |
| DUF3117 domain-containing protein                   | Calc. | <u>5712.64</u> | <u>5712.64</u> | <u>5712.64</u> | 5754.72        | 5692.65 | 5708.65        | 5678.58 | 5686.60        |
| -Met [M+H] <sup>+</sup>                             | Obs.  | 5712.45        | 5711.39        | 5710.68        | 5753.77        | 5692.28 | ND             | 5681.95 | 5686.97        |
| 10 kD Chaperonin GroS -Val [M+2H] <sup>2+</sup>     | Calc. | <u>5249.49</u> | <u>5249.49</u> | <u>5249.49</u> | <u>5249.49</u> | 5255.52 | <u>5249.49</u> | 5263.50 | <u>5249.49</u> |
|                                                     | Obs.  | 5248.94        | 5248.13        | 5247.38        | 5248.20        | 5255.26 | ND             | ND      | 5250.86        |
| DNA-binding prot HU [M+2H] <sup>2+</sup>            | Calc. | <u>4795.04</u> | <u>4795.04</u> | <u>4795.04</u> | <u>4795.04</u> | 4765.48 | 4765.01        | 4758.00 | 4801.05        |
|                                                     | Obs.  | 4793.57        | 4792.28        | 4793.29        | 4794.08        | 4764.56 | 4762.25        | 4760.70 | 4801.21        |
| CsbD-like prot -Val/-Met [M+2H] <sup>2+</sup>       | Calc. | <u>3590.48</u> | <u>3590.48</u> | 3626.02        | 3619.50        | 3655.58 | 3584.95        | 3627.50 | NP             |
|                                                     | Obs.  | 3587.20        | 3587.20        | 3622.35        | 3616.04        | ND      | ND             | ND      | ND             |
| 7 kD Antitoxin -Met [M+2H] <sup>2+</sup>            | Calc. | 3517.79        | 3502.78        | 3493.26        | 3486.27        | 3493.77 | 3470.74        | 3522.32 | 3509.28        |
|                                                     | Obs.  | 3513.32        | 3497.88        | 3489.62        | 3496.78        | 3490.74 | ND             | ND      | 3508.86        |

**Table S4.** Amino acid sequences of the assigned proteins of *Staphylococcus aureus* CCUG 1800<sup>T</sup>. a: Assignment was made by referring to *Cutibacterium* assignment, b: to analysis by Becher *et al.* [11], c: to *S10-spc-alpha* operon gene list, d: to comprehensive genome analysis.

| Protein name                                                 | Gene name   | Amino acid sequence                                                                                                                                                                  | Molecular weight | Assigned m/z                                                             |
|--------------------------------------------------------------|-------------|--------------------------------------------------------------------------------------------------------------------------------------------------------------------------------------|------------------|--------------------------------------------------------------------------|
| 50S ribosomal protein L7/L12 <sup>b</sup>                    | <i>rplL</i> | MANHEQIIIEAIKEMSVLELNDLVKAIEEEFGVTAAAPVAVA<br>GAAGGADAAAEEKTEFDVELTSAGSSKIKVVKAVKEATGLG<br>LKDAKELVDGAPKVIKEALPKEEA EKLKEQLEEVGATVELK<br>MAISQERKNEIIEKYRVHETDTGSPEVQIAVLTA EINAVNEH | 12711.55         | -Met [M+H] <sup>+</sup> : 12580.36                                       |
| 30S ribosomal protein S15 <sup>d</sup>                       | <i>rpsO</i> | LRTHKKDHHSRRGLLKMGVRRRHLLNYLRSKDIQRYRELI<br>KSLGIRR                                                                                                                                  | 10608.25         | -Met [M+H] <sup>+</sup> : 10478.07                                       |
| 30S ribosomal protein S16 <sup>d</sup>                       | <i>rpsP</i> | MAVKIRLTRLGSKRNPFFYRIVVADARSPRDGRIIEQIGTYN<br>PTSANAPEIKVDEALALKWLNDGAKPTDTVHNILSKEGIMK<br>KFDEQKKAK                                                                                 | 10234.86         | -Met [M+H] <sup>+</sup> : 10104.68                                       |
| DNA-binding protein HU <sup>a</sup>                          | <i>hup</i>  | MNKTDLINAVAEQADLTKEAGSAVDV FESIQNSLAKGE<br>KVQLIGFGNF EVRERAARKGRNPQTGKEIDIPASKVPAFK<br>AGKALKDAVK                                                                                   | 9626.01          | [M+H] <sup>+</sup> : 9627.02<br>[M+2H] <sup>2+</sup> : 4814.02           |
| CsbD-like protein <sup>a</sup>                               | ---         | MADESKFEQAKGNVKETVGNVTDNKNLENEGKEDKASG<br>KAKEFVENAKEKATDFIDKVKGNKGE                                                                                                                 | 7018.69          | -Met [M+H] <sup>+</sup> : 6888.51<br>-Met [M+2H] <sup>2+</sup> : 3444.76 |
| 50S ribosomal protein L32 <sup>d</sup>                       | <i>rpmF</i> | MAVPKRRTSKTRKNKRRT HFKISVPGMTECPNCGEYKLS<br>HRVCKNCGSYNGEEVAAK                                                                                                                       | 6484.54          | -Met [M+H] <sup>+</sup> : 6354.36                                        |
| 5.5 kD hypothetical protein <sup>d</sup>                     | ---         | MSFMDKAKDAVEKFKNSDNEQVKNVKDKINEYTGSNNEE<br>KKENEDKEK                                                                                                                                 | 5655.18          | -Met [M+H] <sup>+</sup> : 5525.00                                        |
| Glycopeptide resistance-associated protein GraF <sup>d</sup> | <i>graF</i> | MSNENQNKKAAEKAKEVEEKLKDKKEEKTEDINQTKQDIQ<br>DTLN                                                                                                                                     | 5162.67          | -Met [M+H] <sup>+</sup> : 5032.49                                        |

|                                        |             |                                      |         |                              |
|----------------------------------------|-------------|--------------------------------------|---------|------------------------------|
| 50S ribosomal protein L36 <sup>c</sup> | <i>rpmJ</i> | MKVRPSVKPICEKCKVIKRGKVMVICENPKHKQRQG | 4305.36 | [M+H] <sup>+</sup> : 4306.37 |
|----------------------------------------|-------------|--------------------------------------|---------|------------------------------|

**Table S5.** Comparison chart of observed prominent MALDI peaks and calculated masses of significant proteins in *Staphylococcus* spectra. aur: *S. aureus*, capi capi: *S. capitis* subsp. *capitis*, capi urea: *S. capitis* subsp. *urealiticus*, capr: *S. caprae*, epi: *S. epidermidis*, hom: *S. hominis*, lug: *S. lugdunensis*. Obs.: Observed m/z. Calc.: Calculated m/z. ND: Not detected. NP: Not present. Underlines or double underlines indicate the same calculated m/z values across species and subspecies.

| <u>Protein name</u>                               |       | <u>Species/subspecies</u> |                 |                 |                 |                 |                 |                 |
|---------------------------------------------------|-------|---------------------------|-----------------|-----------------|-----------------|-----------------|-----------------|-----------------|
|                                                   |       | aur                       | capi capi       | capi urea       | capr            | epi             | hom             | lug             |
| Putative sheep haemoglobin                        | Calc. | 15033.17                  | 15033.17        | 15033.17        | 15033.17        | 15033.17        | 15033.17        | 15033.17        |
| alpha chain -Met [M+H] <sup>+</sup>               | Obs.  | <u>15042.92</u>           | <u>15046.25</u> | <u>15043.91</u> | <u>15044.56</u> | <u>15042.32</u> | <u>15041.76</u> | <u>15043.53</u> |
| 50S ribosomal prot L7/L12 -Met [M+H] <sup>+</sup> | Calc. | 12580.36                  | <u>12533.27</u> | <u>12533.27</u> | <u>12533.27</u> | 12519.25        | 12532.23        | 12475.18        |
|                                                   | Obs.  | <u>12577.10</u>           | <u>12530.38</u> | ND              | <u>12531.30</u> | ND              | <u>12526.23</u> | ND              |
| 30S ribosomal prot S15 -Met [M+H] <sup>+</sup>    | Calc. | <u>10478.07</u>           | <u>10477.08</u> | <u>10477.08</u> | <u>10478.07</u> | 10507.11        | 10521.14        | 10409.99        |
|                                                   | Obs.  | <u>10479.53</u>           | <u>10474.45</u> | <u>10473.15</u> | <u>10480.77</u> | <u>10501.76</u> | <u>10515.16</u> | <u>10409.12</u> |
| 30S ribosomal prot S16 -Met [M+H] <sup>+</sup>    | Calc. | 10104.68                  | <u>10192.69</u> | <u>10192.69</u> | <u>10229.76</u> | <u>10229.76</u> | 10172.74        | 10217.85        |
|                                                   | Obs.  | <u>10101.38</u>           | <u>10193.03</u> | <u>10190.21</u> | <u>10226.78</u> | <u>10227.07</u> | <u>10106.73</u> | <u>10213.89</u> |
| DNA-binding prot HU [M+H] <sup>+</sup>            | Calc. | <u>9627.02</u>            | <u>9641.09</u>  | <u>9641.09</u>  | <u>9627.02</u>  | <u>9627.02</u>  | 9656.04         | 9643.07         |
|                                                   | Obs.  | <u>9624.58</u>            | <u>9639.03</u>  | <u>9639.62</u>  | <u>9625.35</u>  | <u>9625.37</u>  | <u>9653.78</u>  | <u>9640.08</u>  |
| Putative sheep haemoglobin                        | Calc. | 7517.09                   | 7517.09         | 7517.09         | 7517.09         | 7517.09         | 7517.09         | 7517.09         |
| alpha chain -Met [M+2H] <sup>2+</sup>             | Obs.  | <u>7523.76</u>            | <u>7524.89</u>  | <u>7524.35</u>  | <u>7524.22</u>  | <u>7522.63</u>  | <u>7522.85</u>  | <u>7522.40</u>  |
| CsbD-like prot -Met [M+H] <sup>+</sup>            | Calc. | 6888.51                   | <u>6711.31</u>  | <u>6711.31</u>  | 7045.60         | <u>6681.33</u>  | 6476.11         | 7355.01         |
|                                                   | Obs.  | <u>6888.04</u>            | <u>6711.29</u>  | <u>6712.02</u>  | <u>7045.60</u>  | <u>6679.67</u>  | <u>6473.92</u>  | <u>7353.52</u>  |
| 50S ribosomal prot L32 -Met [M+H] <sup>+</sup>    | Calc. | 6354.36                   | <u>6371.39</u>  | <u>6371.39</u>  | 6385.41         | <u>6398.41</u>  | <u>6398.41</u>  | <u>6371.39</u>  |



|                                                  |       |                |                |                |                |                |                |                |
|--------------------------------------------------|-------|----------------|----------------|----------------|----------------|----------------|----------------|----------------|
|                                                  | Obs.  | 6353.70        | 6370.44        | 6371.43        | 6385.44        | 6396.83        | 6396.33        | 6370.26        |
| 5.5 kD Hypothetical prot -Met [M+H] <sup>+</sup> | Calc. | 5525.00        | <u>5098.48</u> | <u>5098.48</u> | 5213.52        | 5338.87        | 5237.68        | 5165.57        |
|                                                  | Obs.  | 5524.85        | 5098.60        | 5098.86        | 5213.87        | 5337.31        | 5236.04        | 5164.67        |
| Glycopeptide resistance-                         | Calc. | 5032.49        | <u>5041.45</u> | <u>5041.45</u> | 5014.38        | 5112.57        | 4564.92        | 4953.38        |
| . associated prot GraF -Met [M+H] <sup>+</sup>   | Obs.  | 5032.46        | 5041.61        | 5041.85        | 5015.48        | 5111.36        | 4563.08        | 4952.56        |
| DNA-binding prot HU [M+2H] <sup>2+</sup>         | Calc. | <u>4814.02</u> | <u>4821.05</u> | <u>4821.05</u> | <u>4814.02</u> | <u>4814.02</u> | 4829.03        | 4822.04        |
|                                                  | Obs.  | 4813.80        | 4822.65        | 4821.11        | 4812.46        | 4813.13        | 4827.57        | 4821.12        |
| 50S ribosomal prot L36 [M+H] <sup>+</sup>        | Calc. | 4306.37        | <u>4292.34</u> | <u>4292.34</u> | <u>4292.34</u> | <u>4292.34</u> | <u>4292.34</u> | <u>4292.34</u> |
|                                                  | Obs.  | 4305.95        | 4292.22        | 4292.43        | 4292.43        | 4290.37        | 4290.72        | 4291.35        |
| CsbD-like prot -Met [M+2H] <sup>2+</sup>         | Calc. | 3444.76        | <u>3356.16</u> | <u>3356.16</u> | 3523.31        | 3341.17        | 3238.56        | 3678.01        |
|                                                  | Obs.  | 3443.31        | 3356.11        | 3355.13        | 3522.30        | 3338.78        | 3236.21        | 3676.55        |

**Figure S1.** Identification of ORFs encoding GraF in *Staphylococcus* strains. A. Flanking region of the *GraF* gene. The *GraF* gene is located between two ORFs encoding ‘Hypothetical protein’ and ‘ECF transporter S component’ in the genome of DSM 20231<sup>T</sup>. The GenBank IDs for the genomic sequences and the locations of the predicted *GraF* gene in the strains, DSM 6717<sup>T</sup>, NCTC 12196<sup>T</sup>, and NCTC 11320<sup>T</sup>, were shown below. B. An alignment of predicted amino acid sequences of GraF. Sequence similarity scores (%) to the GraF protein in DSM 20231<sup>T</sup> were shown right.

**A**

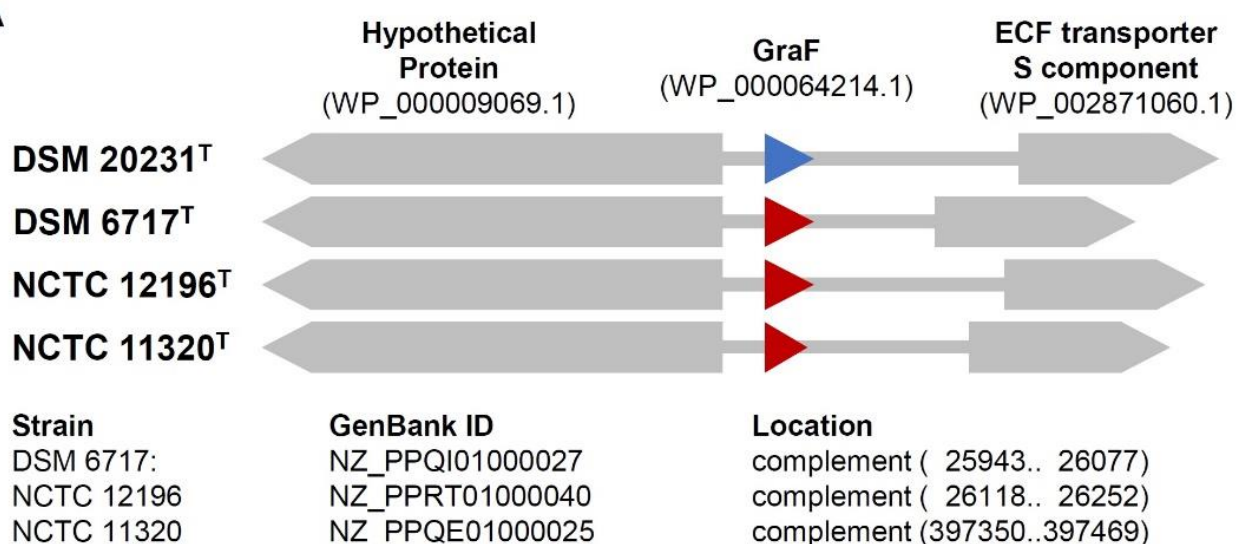

**B**

|            |                                               |      |
|------------|-----------------------------------------------|------|
| DSM 20231  | MSNENQNKKAAEKAKEVEEKLKDKKEEKTEDINQTKQDIQDTLN  |      |
| AYP 1020   | MGKEEFEEKKSAEKAKEAEKLEQNEEKTDDIEQTKKDVQDTLD   | 65 % |
| DSM 6717   | MGKEEFEEKKSAEKAKEAEKLEQNEEKTDDIEQTKKDVQDTLD   | 65 % |
| NCTC 12196 | MGKEEFEEKKSAEKAKEAEKLEQNEEKSNDTEQTKKDVQDTLD   | 61 % |
| ATCC 14990 | MTNKEFEKKSAEKAKEVEEKLKLEQNEEKTDDIEQTKKDIQDTLD | 70 % |
| NCTC 11320 | MTHED-----AKKAKEYEEKLKEQKEEKTDDIEQTKQDVQNTLD  | 64 % |
| NCTC 12217 | MSNEELNKKSAEKAKEAEKLEKKEESTEDSIEQTKKDVQDTLD   | 65 % |
|            | * * * * *                                     |      |

**Figure S2.** Comparison of MALDI-TOF spectra of *Cutibacterium* and *Staphylococcus* species growing on agar plates with and without sheep blood. All materials were prepared on day 5 under otherwise the same culture conditions. Green boxes indicate presence of ca.  $m/z$  15045 peaks with sheep blood in the agar plates.

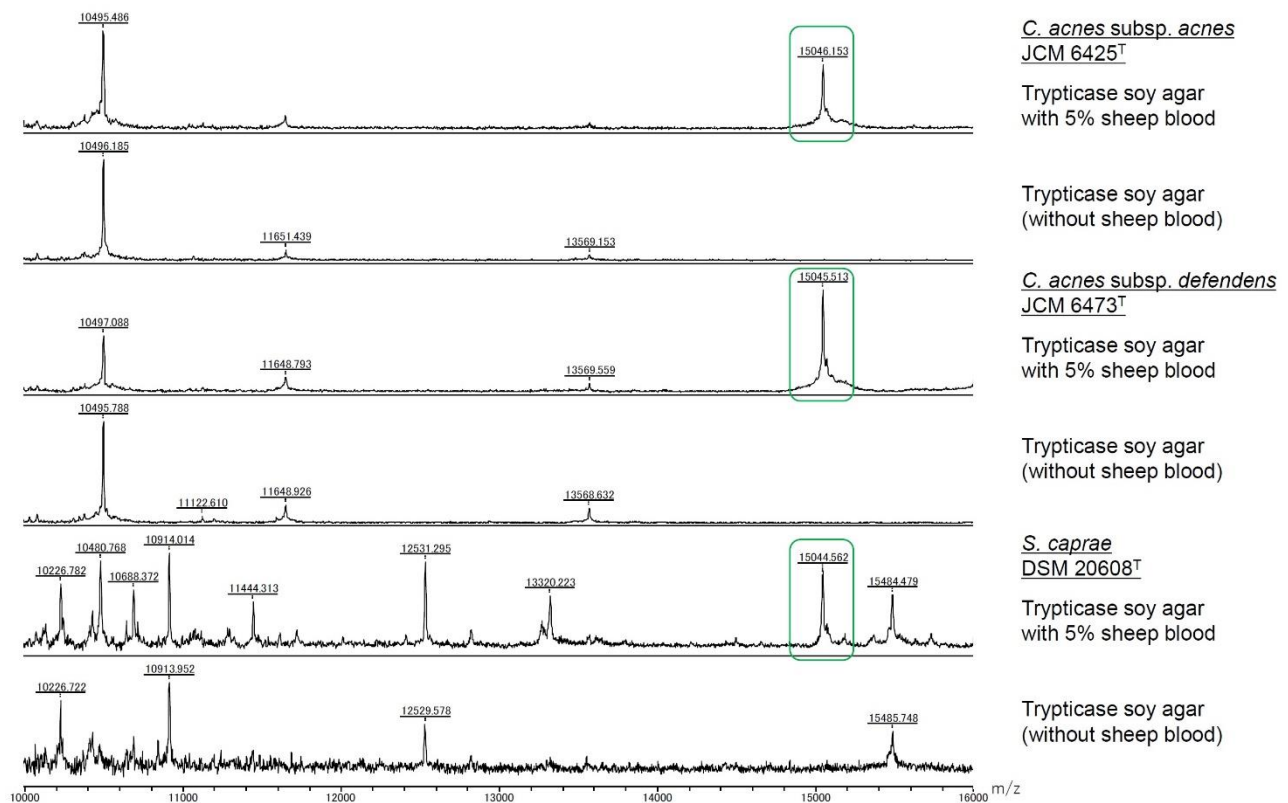

Supplement: s1 [file s1]
